# Supplementary material for: Discovery of Novel Mono-Carbonyl Curcumin Derivatives as Potential Anti-Hepatoma Agents
Source: MDPI journal article supplement (doi:10.3390/molecules28196796), 2023-09-25
Supplement: s1 [file s1]

# Discovery of Novel Mono-Carbonyl Curcumin Derivatives as Potential Anti-Hepatoma Agents

Weiya Cao <sup>1,2</sup>, Pan Yu <sup>1,2,\*</sup>, Shilong Yang <sup>3</sup>, Zheyu Li <sup>2</sup>, Qixuan Zhang <sup>2</sup>, Zengge Liu <sup>2</sup> and Hongzhuo Li <sup>2</sup>

<sup>1</sup> College of Public Health, Anhui University of Science and Technology, Hefei 230000, China; sml131415@163.com

<sup>2</sup> College of Medicine, Anhui University of Science and Technology, Huainan 232001, China; 17758194831@163.com (Z.L.); 13753738161@163.com (Q.Z.); 15771326234@163.com (Z.L.); 17767778237@163.com (H.L.)

<sup>3</sup> College of Chemical Engineering, Nanjing Forestry University, Nanjing 210037, China; yshl6072@njfu.edu.cn

\* Correspondence: 2020035@aust.edu.cn

## <sup>1</sup>H NMR, <sup>13</sup>C NMR of target compounds

(1E,4E)-1,5-bis(4-hydroxy-3-methoxyphenyl)penta-1,4-dien-3-one (2)

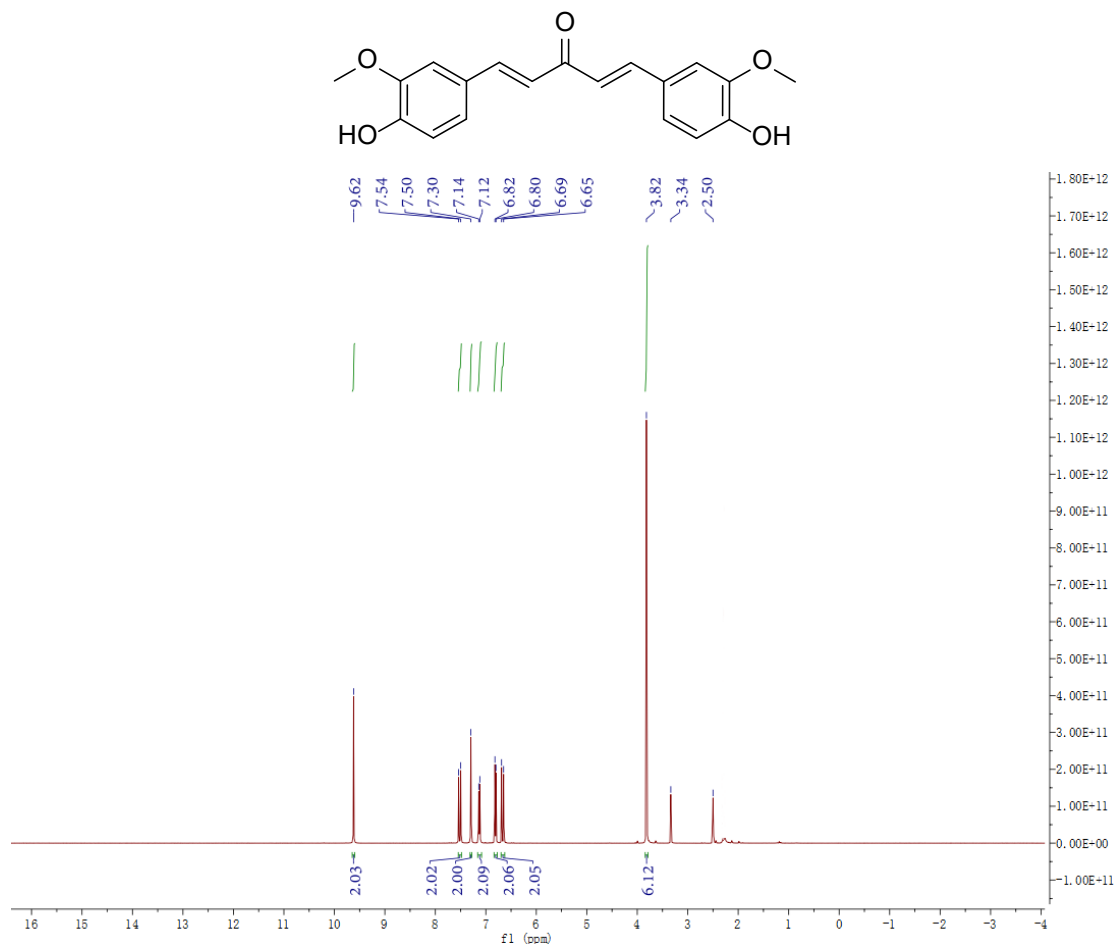

Figure S1. <sup>1</sup>H-NMR spectrum of compound 2

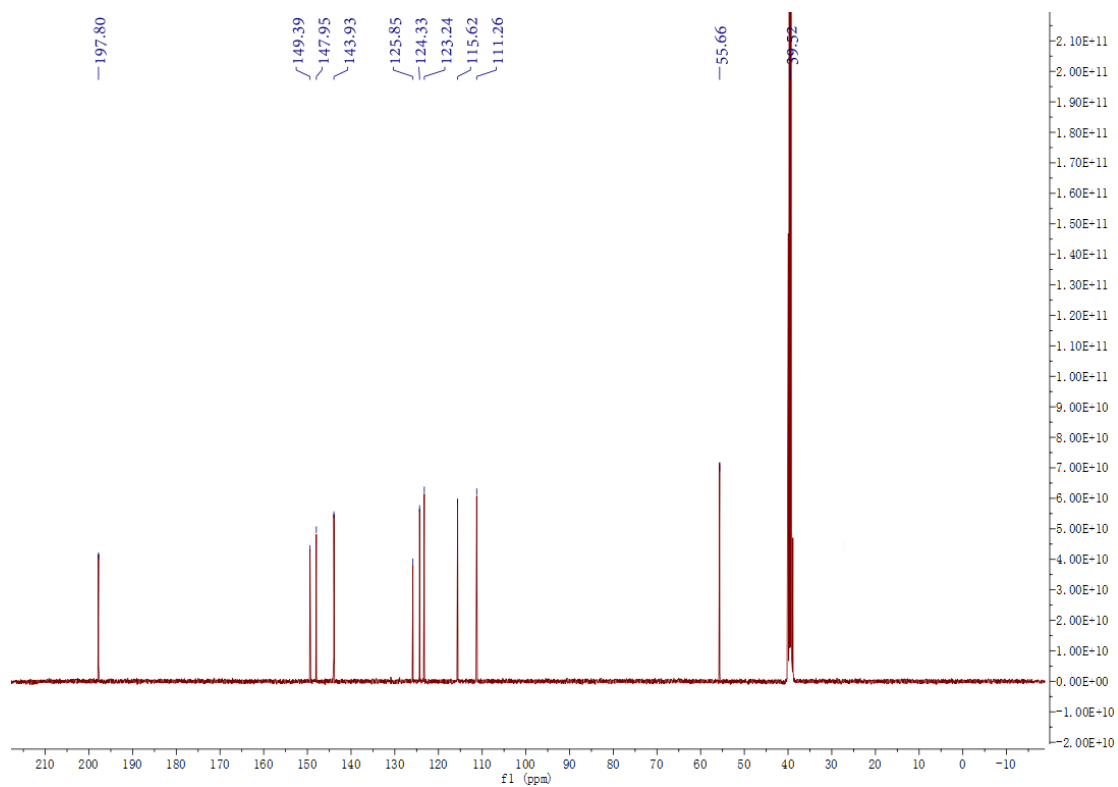

Figure S2.  $^{13}\text{C}$ -NMR spectrum of compound **2**

((1E,4E)-3-oxopenta-1,4-diene-1,5-diyl)bis(2-methoxy-4,1-phenylene) dibenzoate (**G1**)

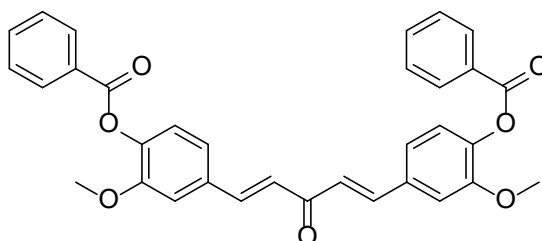

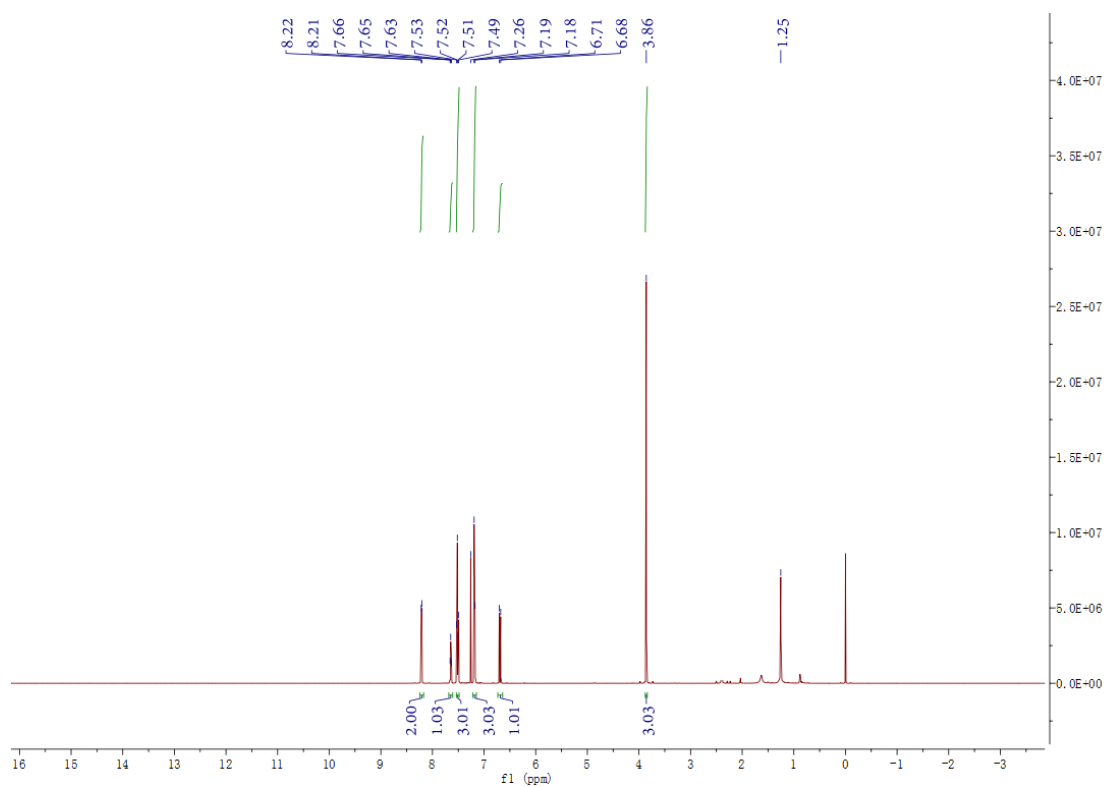

Figure S3. <sup>1</sup>H-NMR spectrum of compound **G1**

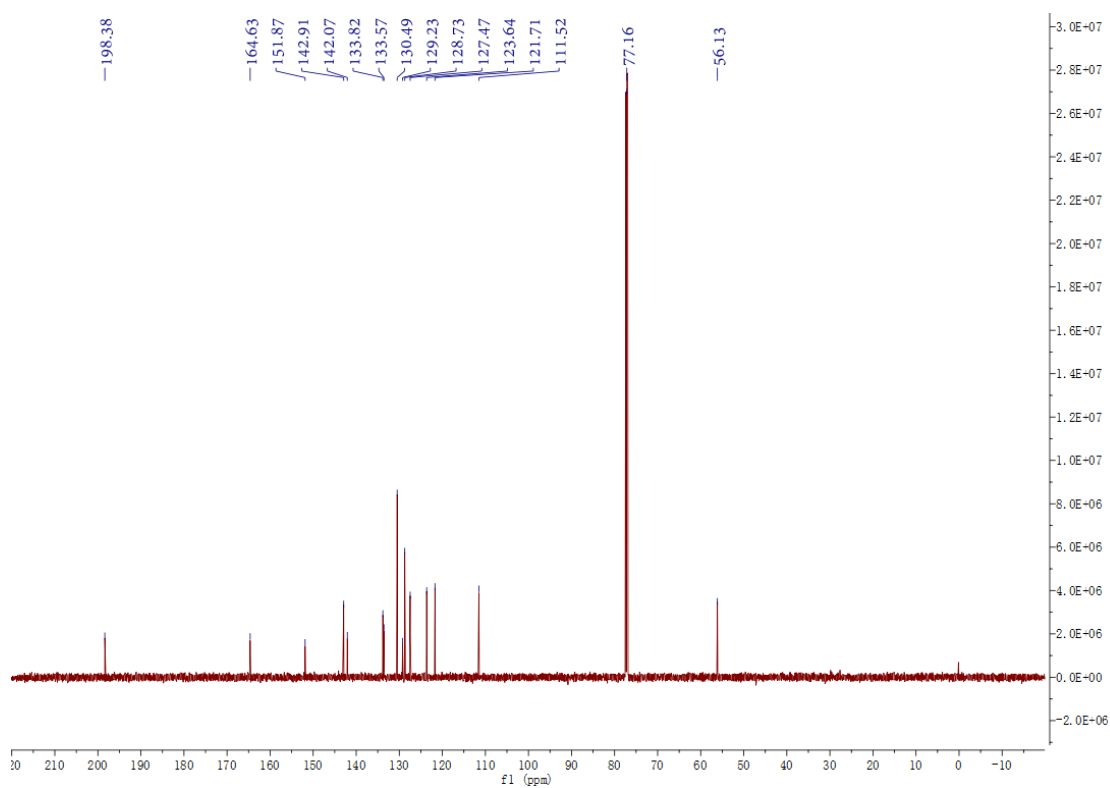

Figure S4. <sup>13</sup>C-NMR spectrum of compound **G1**

((1E,4E)-3-oxopenta-1,4-diene-1,5-diyl)bis(2-methoxy-4,1-phenylene) bis(4-fluorobenzoate) (**G2**)

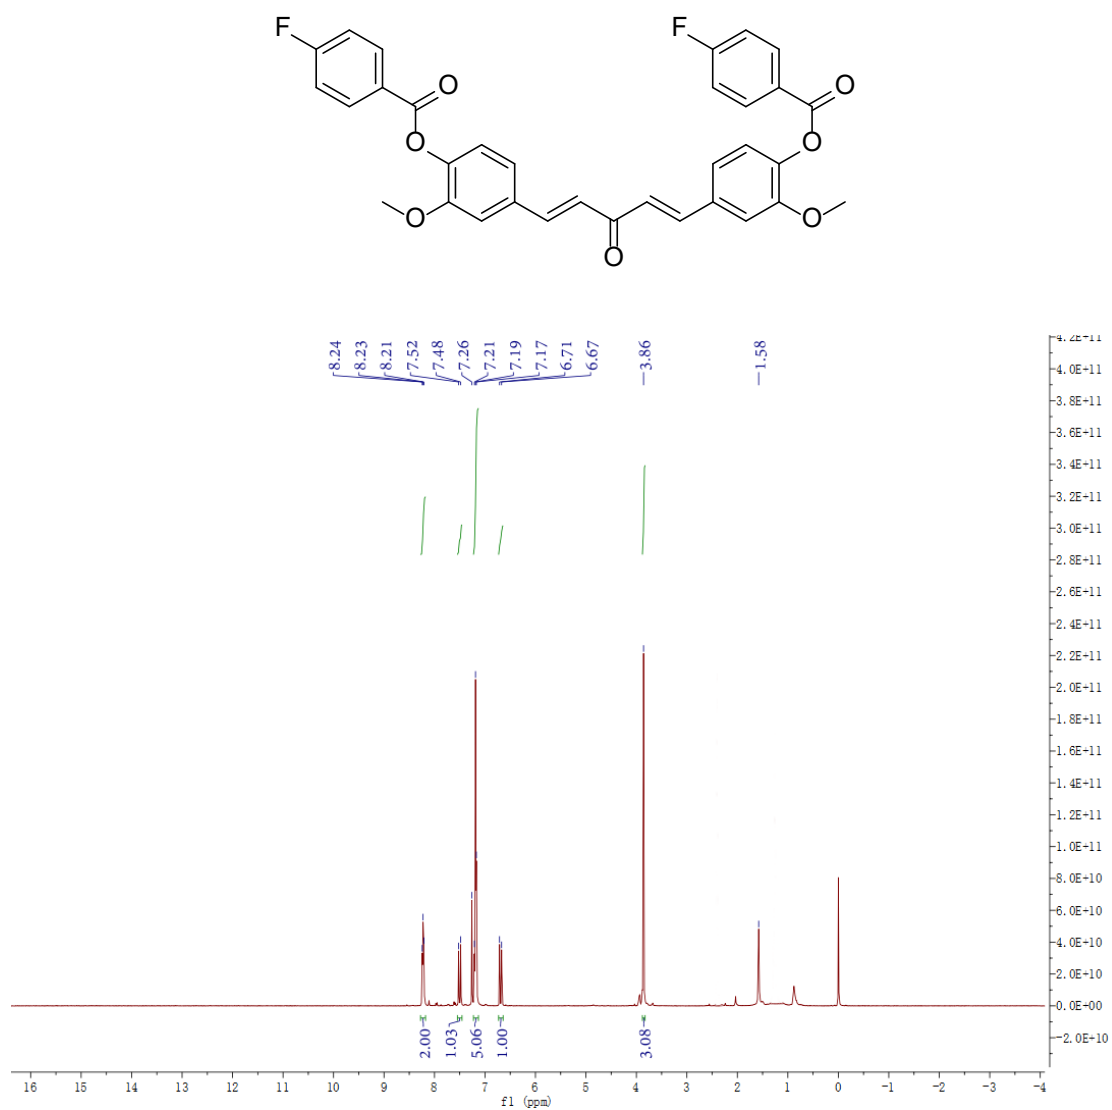

Figure S5. <sup>1</sup>H-NMR spectrum of compound **G2**

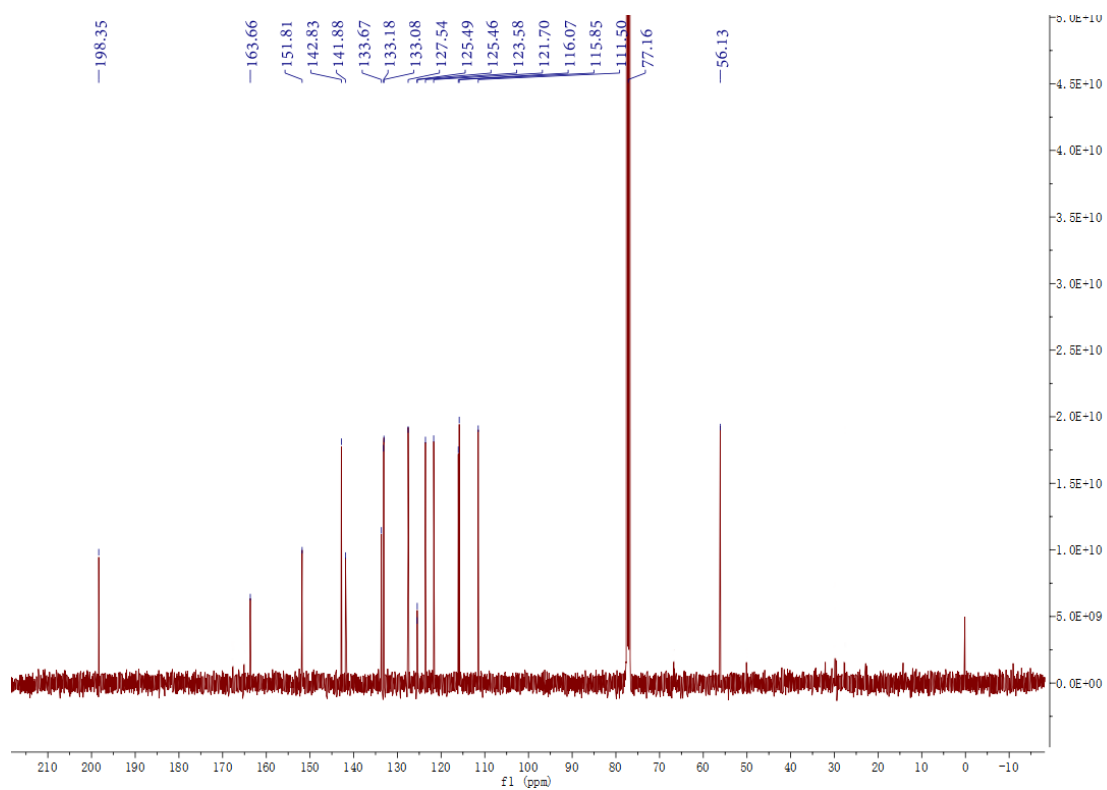

Figure S6.  $^{13}\text{C}$ -NMR spectrum of compound **G2**

((1E,4E)-3-oxopenta-1,4-diene-1,5-diyl)bis(2-methoxy-4,1-phenylene) bis(4-chlorobenzoate) (**G3**)

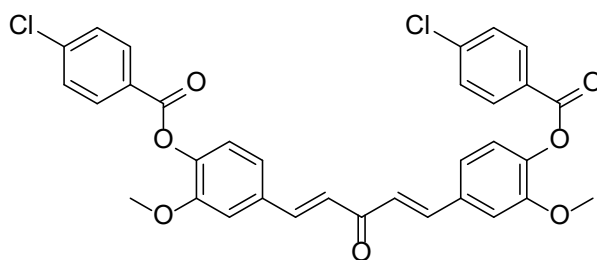

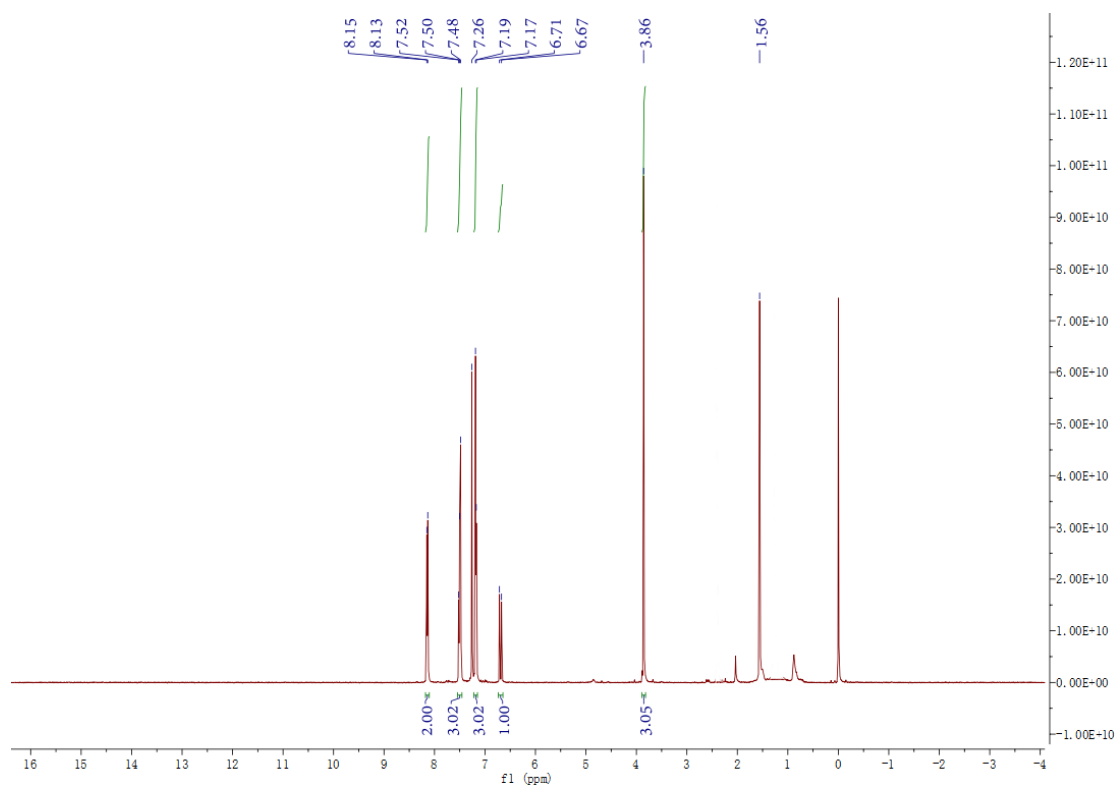

Figure S7. <sup>1</sup>H-NMR spectrum of compound **G3**

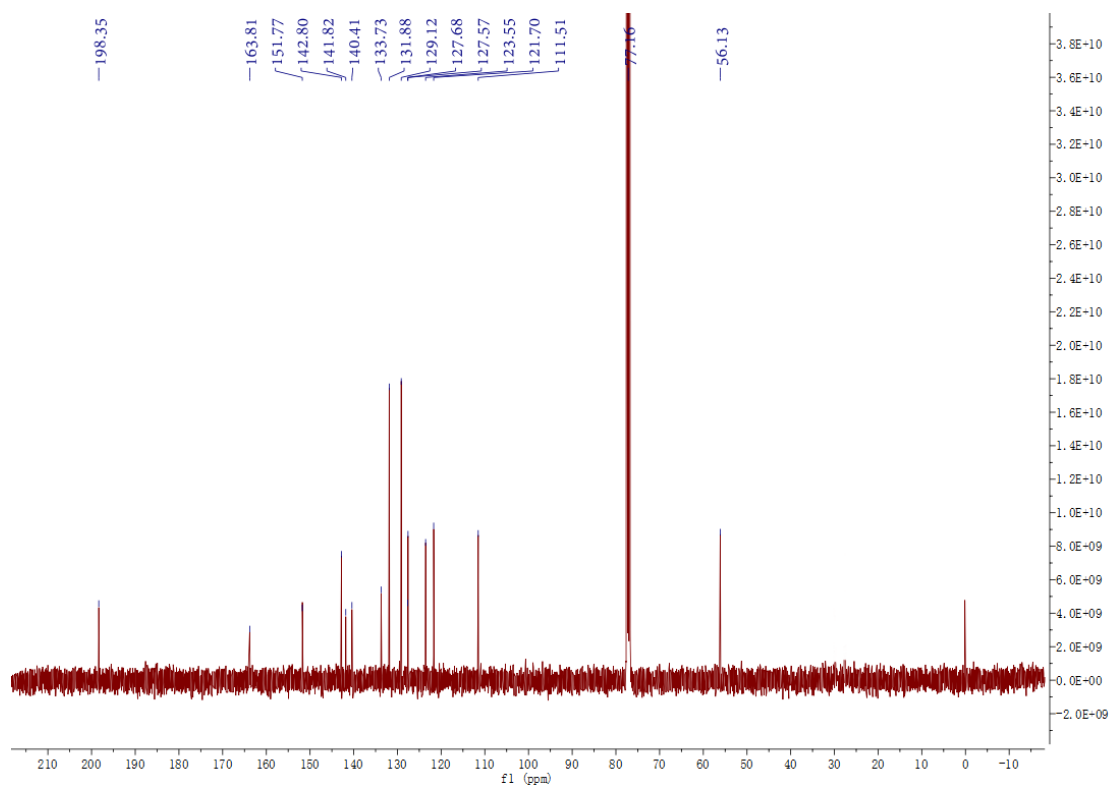

Figure S8. <sup>13</sup>C-NMR spectrum of compound **G3**

((1E,4E)-3-oxopenta-1,4-diene-1,5-diyl)bis(2-methoxy-4,1-phenylene) bis(4-bromobenzoate) (**G4**)

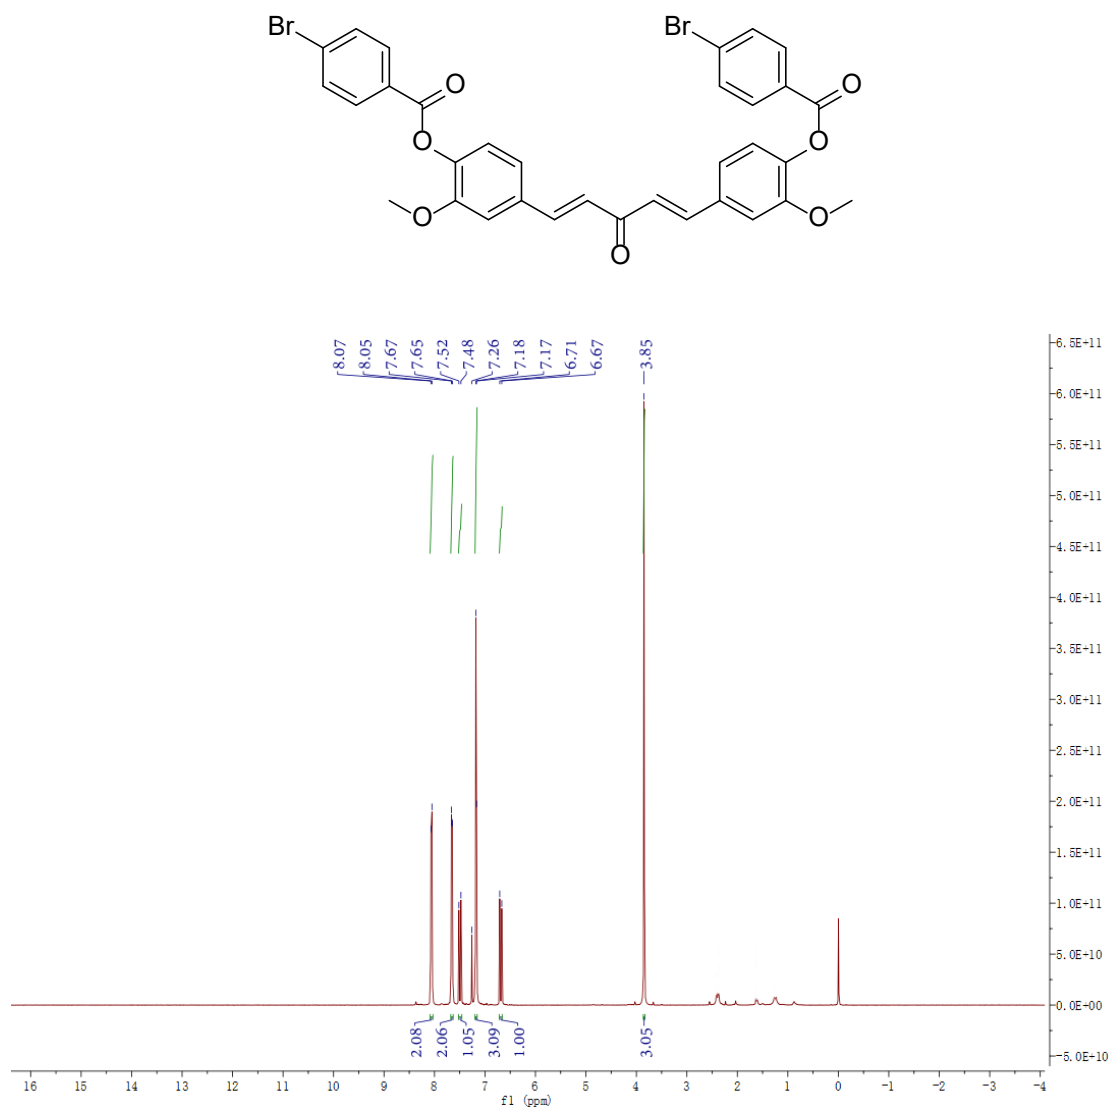

Figure S9. <sup>1</sup>H-NMR spectrum of compound **G4**

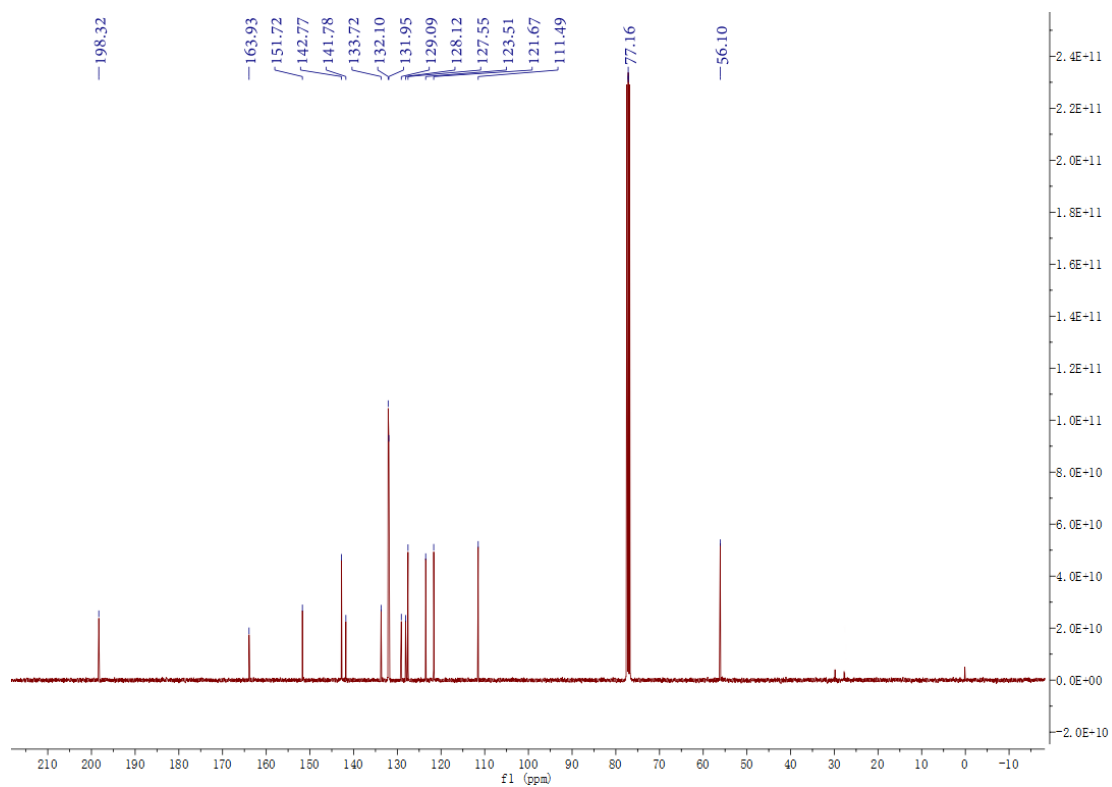

Figure S10.  $^{13}\text{C}$ -NMR spectrum of compound **G4**

((1E,4E)-3-oxopenta-1,4-diene-1,5-diyl)bis(2-methoxy-4,1-phenylene) bis(4-(trifluoromethyl)benzoate) (**G5**)

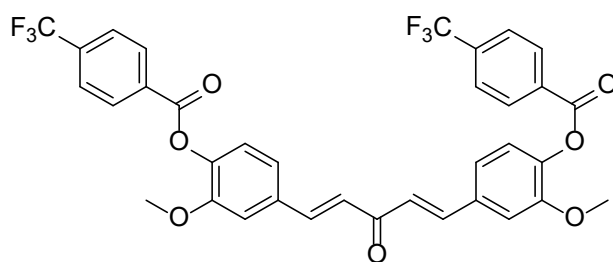



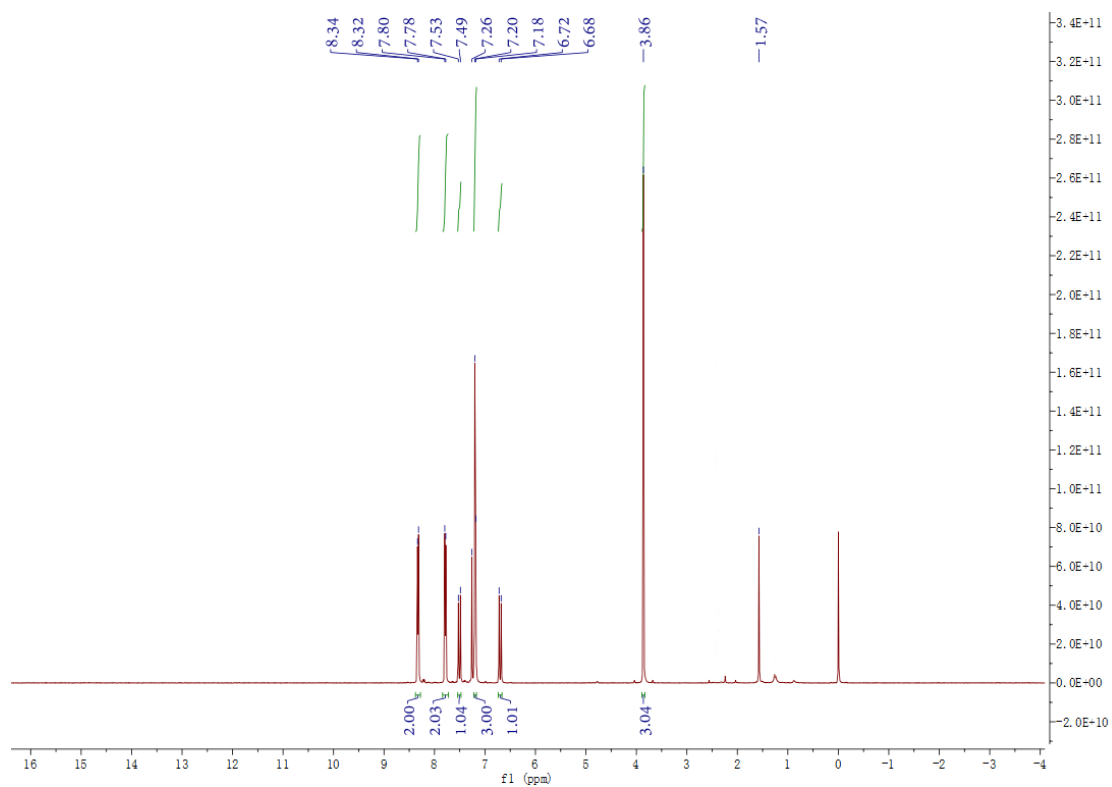

Figure S11. <sup>1</sup>H-NMR spectrum of compound **G5**

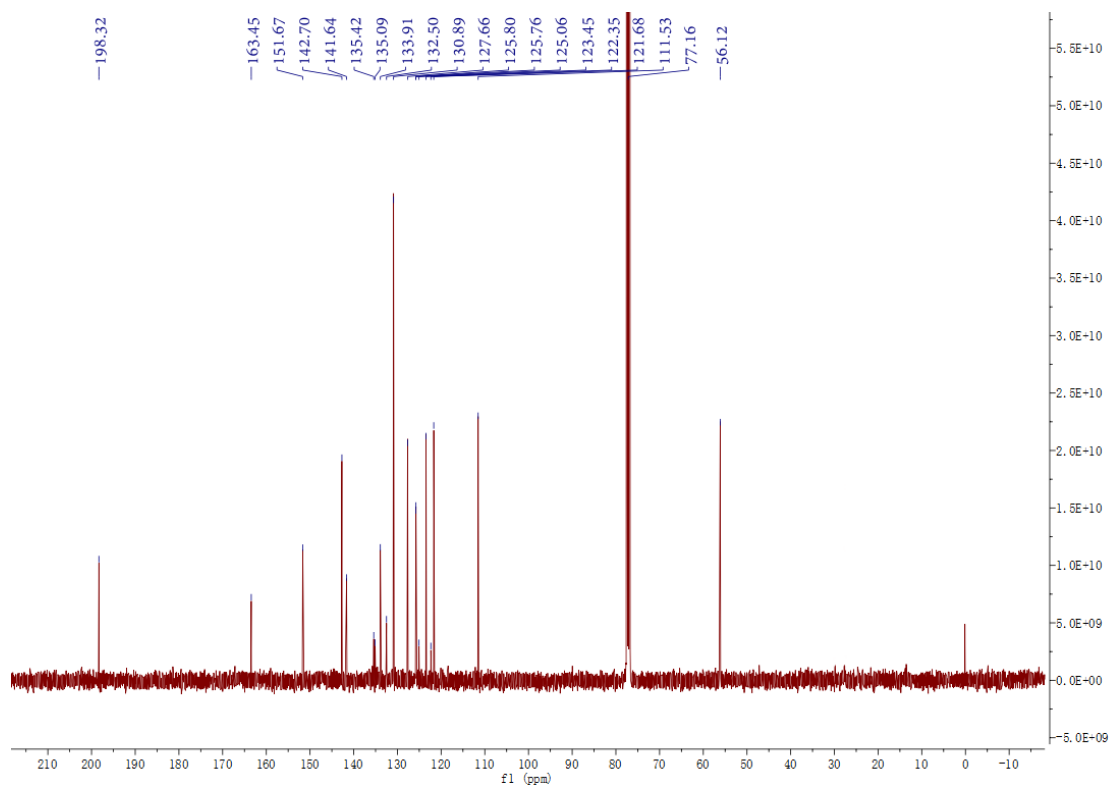

Figure S12. <sup>13</sup>C-NMR spectrum of compound **G5**

((1E,4E)-3-oxopenta-1,4-diene-1,5-diyl)bis(2-methoxy-4,1-phenylene) bis(2-hydroxybenzoate)

(G6)

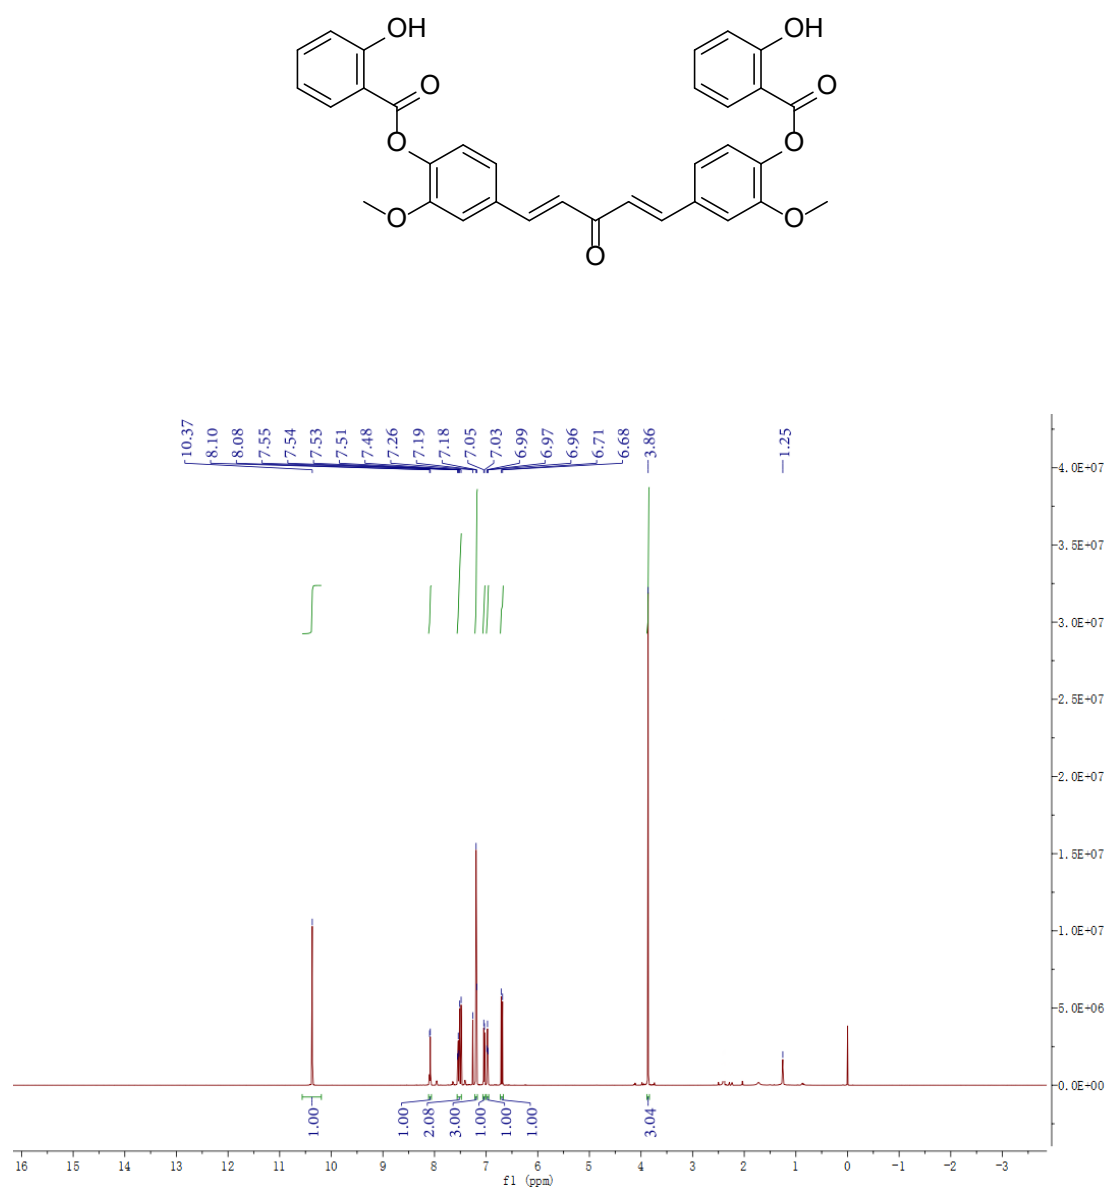

Figure S13. <sup>1</sup>H-NMR spectrum of compound G6

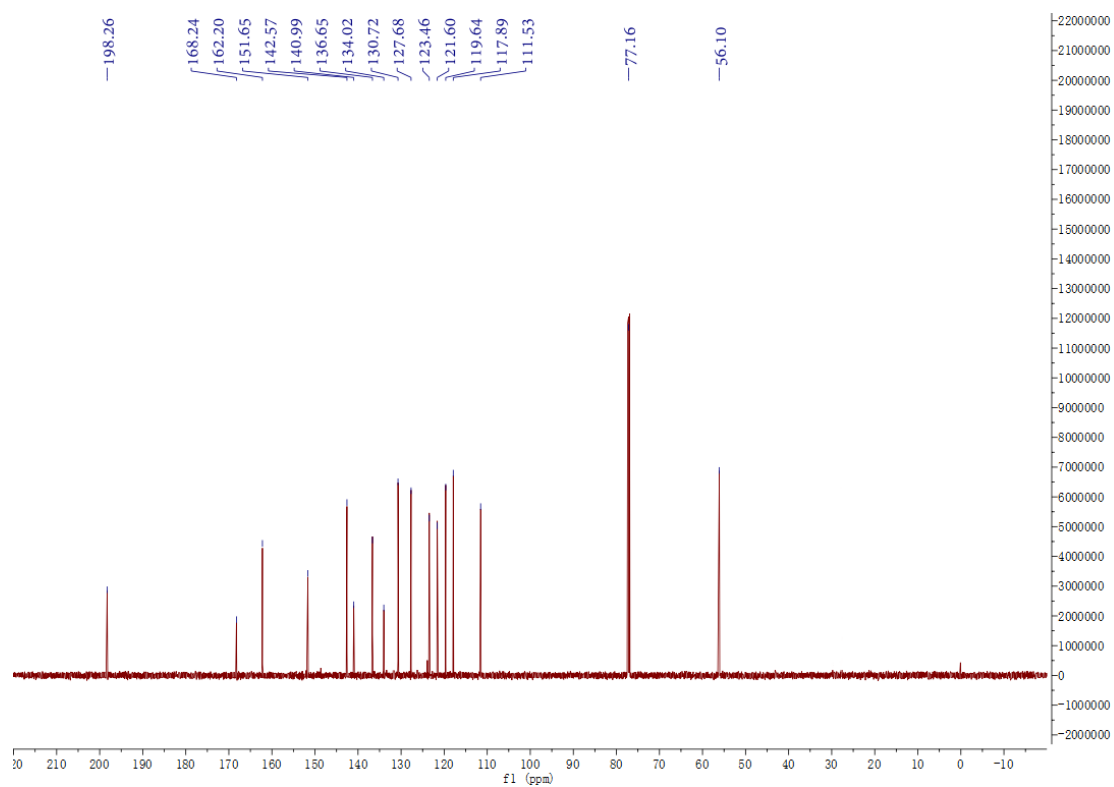

Figure S14.  $^{13}\text{C}$ -NMR spectrum of compound **G6**

((1E,4E)-3-oxopenta-1,4-diene-1,5-diyl)bis(2-methoxy-4,1-phenylene) dinicotinate (**G7**)

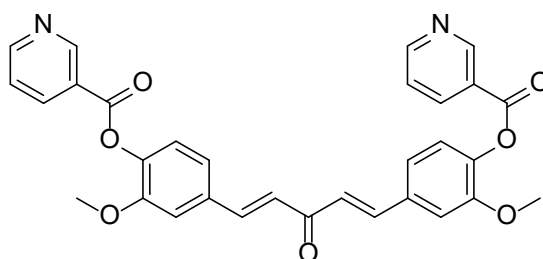

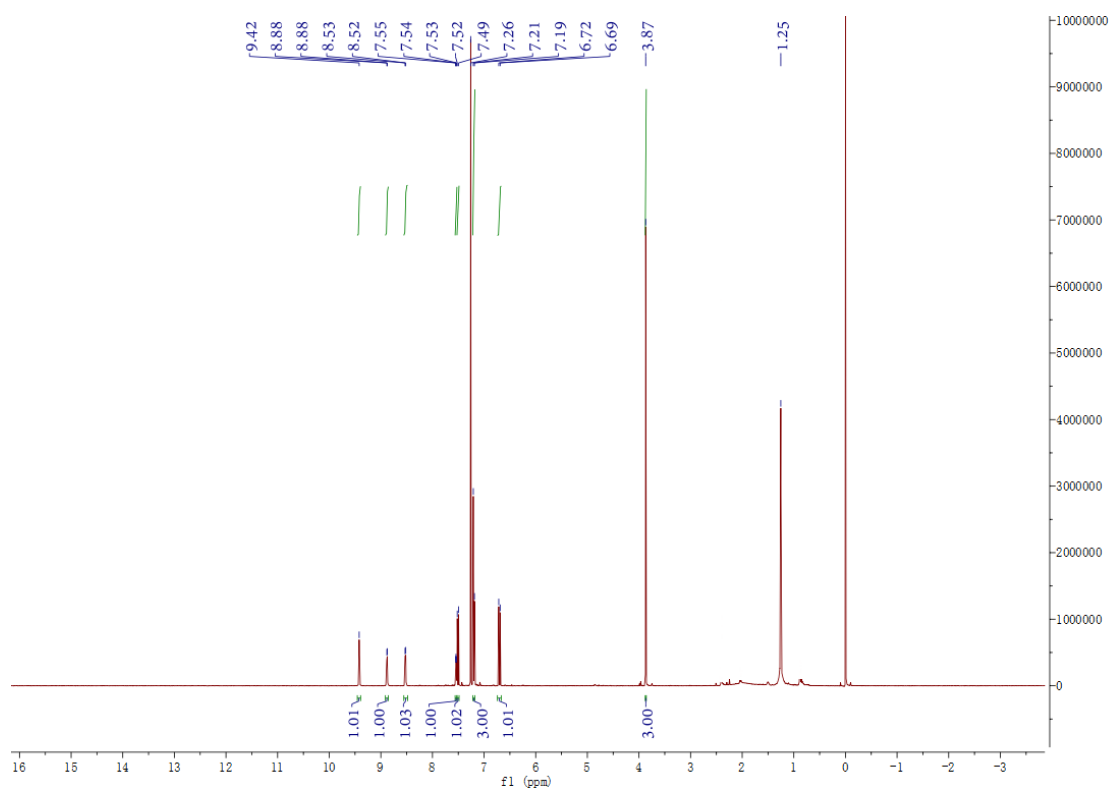

Figure S15. <sup>1</sup>H-NMR spectrum of compound **G7**

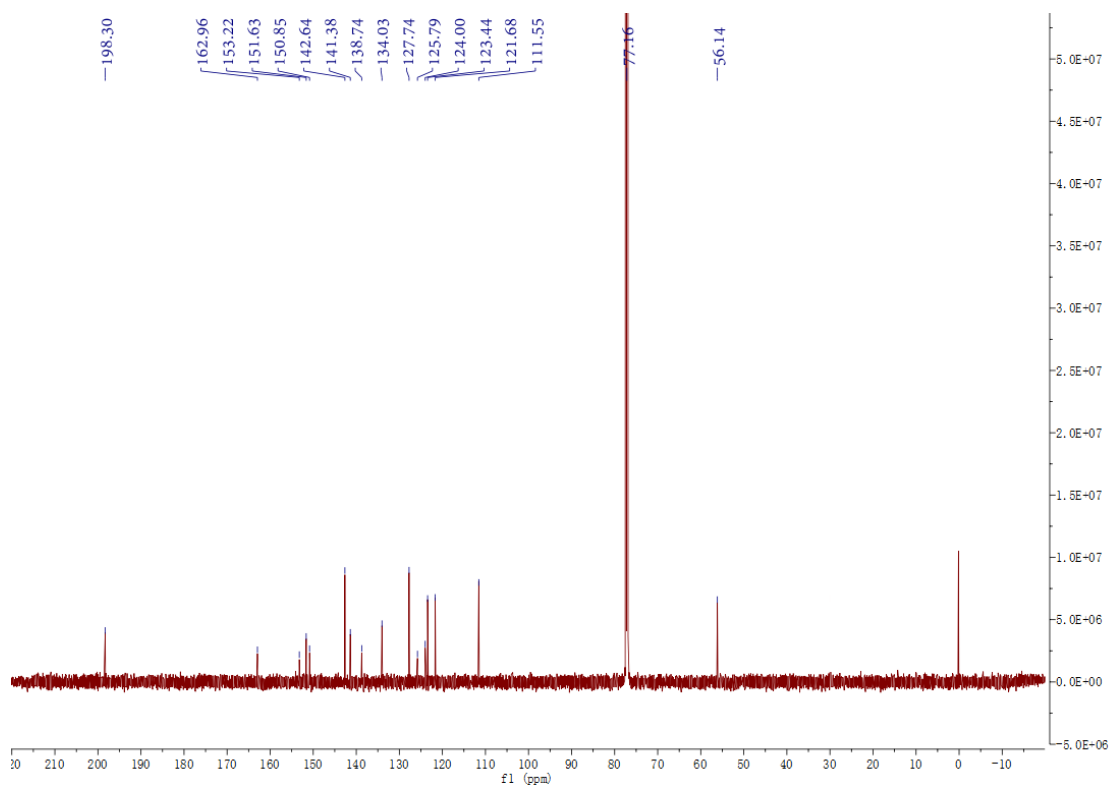

Figure S16. <sup>13</sup>C-NMR spectrum of compound **G7**
